# Supplementary material
Source: Research Square preprint supplement (doi:10.21203/rs.3.rs-9038688/v1)
Supplement: Supplementary file 1 [file 2e020c6a64541c85a28e1f43.doc]

**Highlights**

- The third-order nonlinear parameter of ultrasonic guided waves is highly sensitive to early-stage fatigue damage.
- This third-order nonlinear parameter serves as a characteristic index for the localization of early fatigue damage.
- The fatigue damage localization algorithm based on this parameter achieves damage identification during the early stage (at approximately 73% of the total fatigue life) and enables accurate early warning signals by the time the fatigue life reaches 95%.
- This approach is capable of achieving full-life-cycle detection, covering the evolution from early fatigue damage to macroscopic fatigue cracks.
